# Supplementary material
Source: Springer Nature journal article supplement (https://www.springermedizin.de/resource/supplementary/13058_2010_2742_MOESM8_ESM.pdf/9702054)

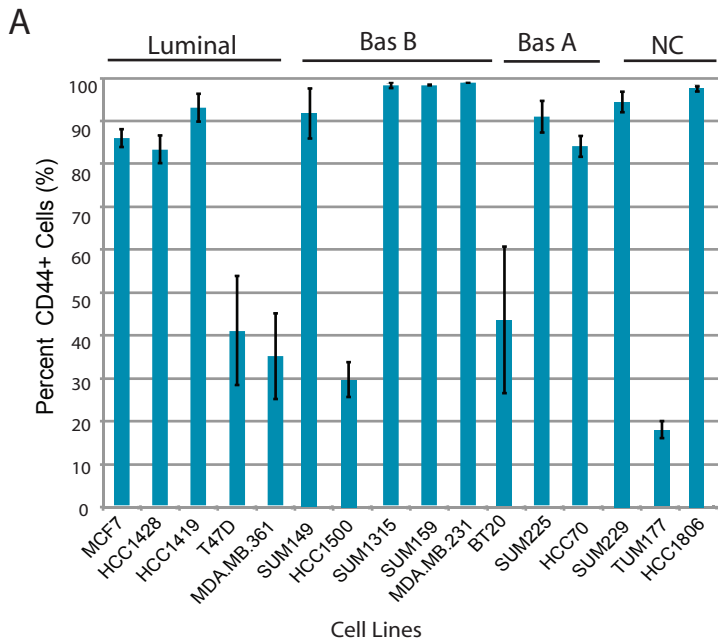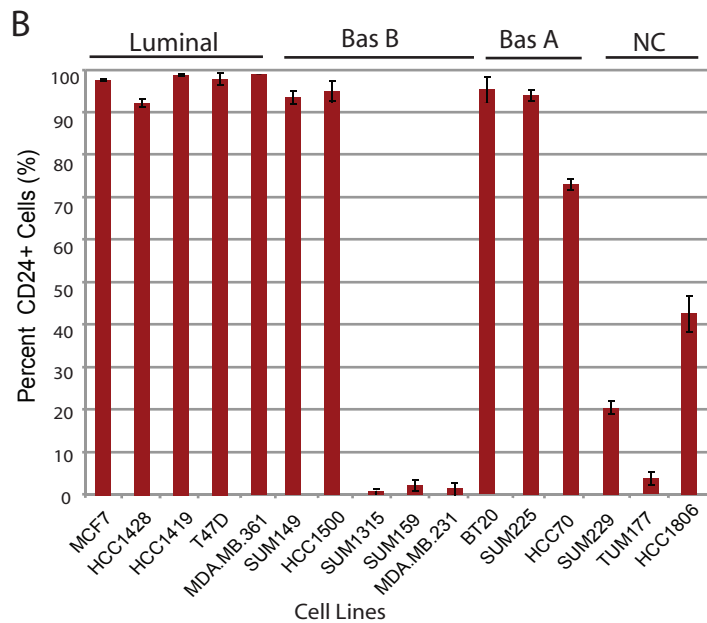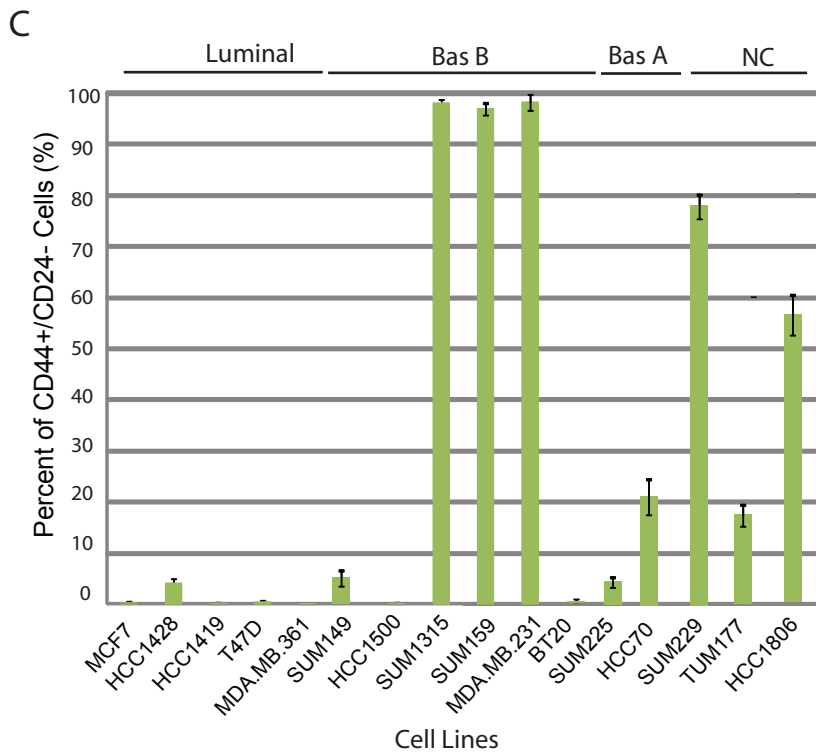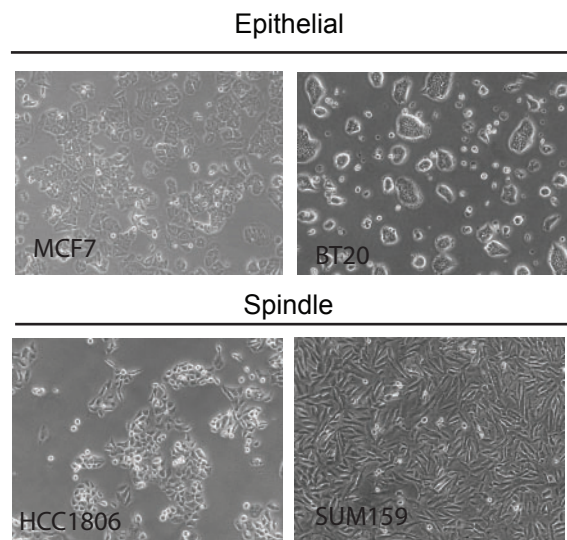

Supplement: MOESM8 [file 9702054]
